# Supplementary material
Source: PubMed Central journal article supplement (PMC2998102)
Supplement: supp_M110.156026_jbc.M110.156026-1.pdf [file supp_M110.156026_jbc.M110.156026-1.pdf]

**A**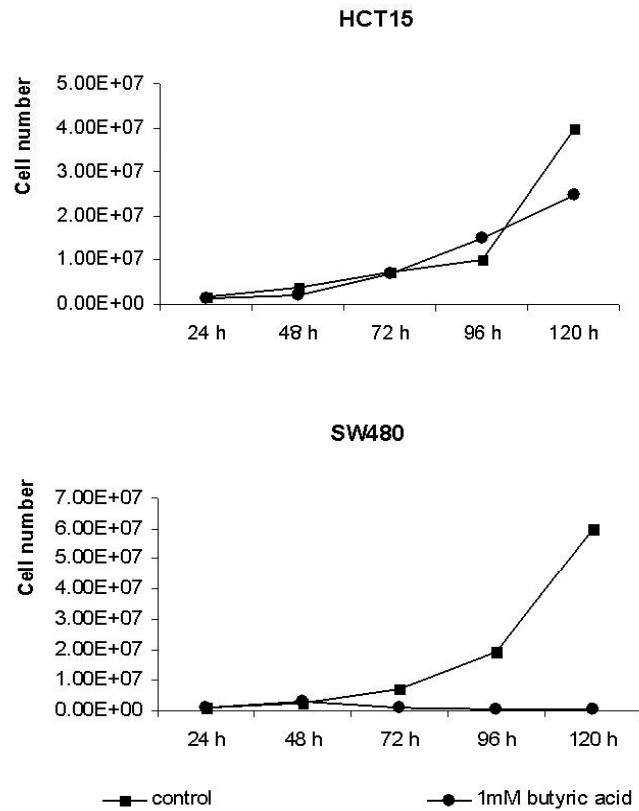**B**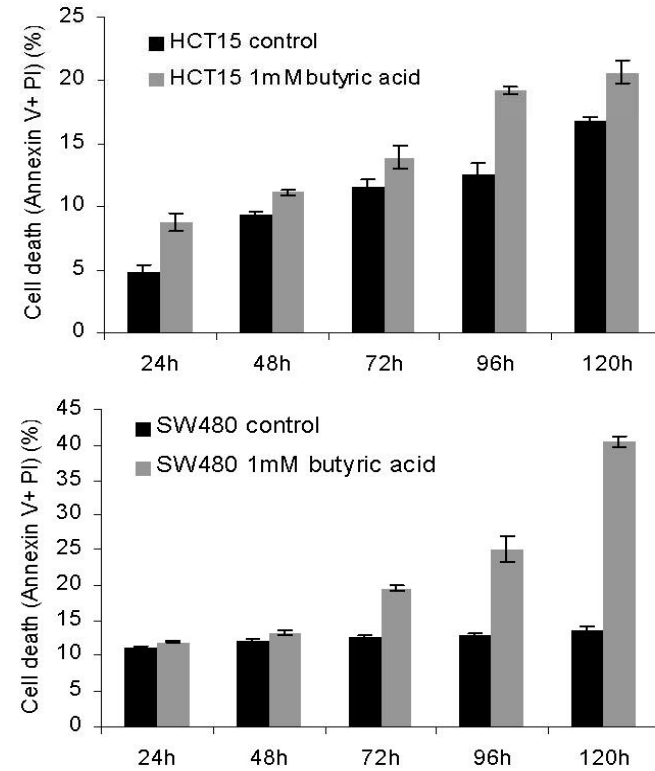

**Supplemental Figure 1. HCT15 cells are resistant to butyrate while SW480 is sensitive to butyrate.** A) Growth curves for HCT15 and SW480 cell lines in control DMEM 10% FBS and DMEM 10% FBS supplemented with 1mM butyric acid, and B) cell death (necrosis + apoptosis) determination in control and butyrate-selected cultures.
